# Supplementary material for: Strong base pre-treatment for colorimetric sensor array detection and identification of N-methyl carbamate pesticides
Source: Royal Society of Chemistry journal article supplement (doi:10.1039/c5ra25805g), 2016-01-01
Supplement: c5ra25805g1.pdf [file c5ra25805g1.pdf]

## Electronic Supplementary Information

### **Strong base pre-treatment for colorimetric sensor array detection and identification of N-methyl carbamate pesticides**

Sihua Qian,<sup>a</sup> Yumin Leng,<sup>a,b</sup> and Hengwei Lin<sup>a,\*</sup>

<sup>a</sup>Ningbo Institute of Materials Technology & Engineering (NIMTE), Chinese Academy of Sciences, Ningbo 315201, China

<sup>b</sup>College of Physics and Electronic Engineering, Nanyang Normal University, Nanyang 473061, China

*\*E-mail: linhengwei@nimte.ac.cn; Tel: +86 574 86685130; Fax: +86 574 86685163*

**Table S1** Composition of the developed 1×5 phenol responsive array.

| Sensor unit | Composition of phenol responsive indicator                                                                                       |
|-------------|----------------------------------------------------------------------------------------------------------------------------------|
| 1           | 4-nitrobenzenediazonium tetrafluoroborate (100 μM) in Na <sub>2</sub> CO <sub>3</sub> -NaHCO <sub>3</sub> buffer (10 mM, pH 9.5) |
| 2           | 2,6-dibromoquinone-4-chloroimide (100 μM) in Na <sub>2</sub> CO <sub>3</sub> -NaHCO <sub>3</sub> buffer (10 mM, pH 9.5)          |
| 3           | NaNO <sub>2</sub> (0.15 M)+H <sub>2</sub> SO <sub>4</sub> (0.16 mM)+resorcinol (1.1 mM) in NaOH solution (2.78 M)                |
| 4           | MBTH (0.4 mM)+ammonium ceric sulfate (0.3 mM) + buffer A (0.04% v/v) in aqueous solution                                         |
| 5           | Sodium nitroprusside (0.2 mM)+hydroxylamine hydrochloride (0.8 mM)+buffer B (0.06% v/v) in aqueous solution                      |

Buffer A (pH 14): NaOH (4.8 g), EDTA (2.0 g) and boric acid (0.8 g) were dissolved in 50 mL distilled water, and then mixed with equivalent volume ethanol before use; Buffer B (pH 12): 50 mL of KH<sub>2</sub>PO<sub>4</sub> solution (0.1 M) mixed with 1.75 mL of NaOH solution (6.0 M) and then diluted to 100 mL with distilled water.

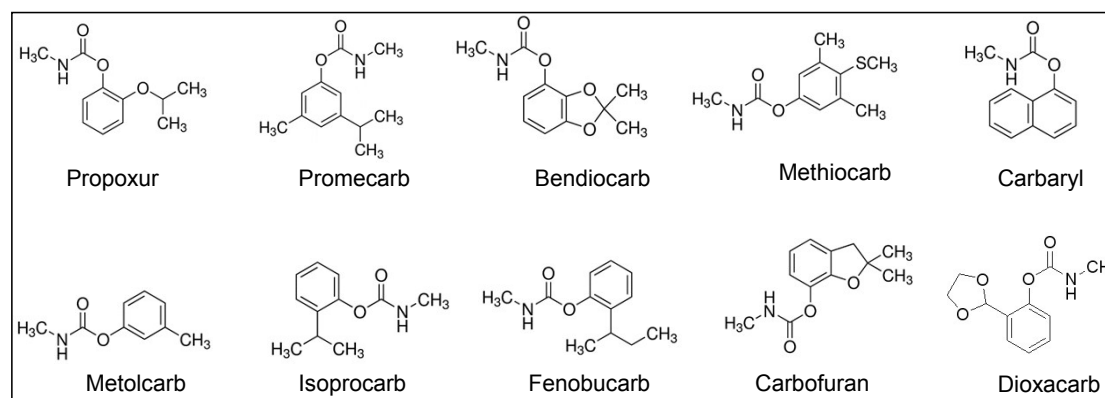

#### N-methyl Carbamates

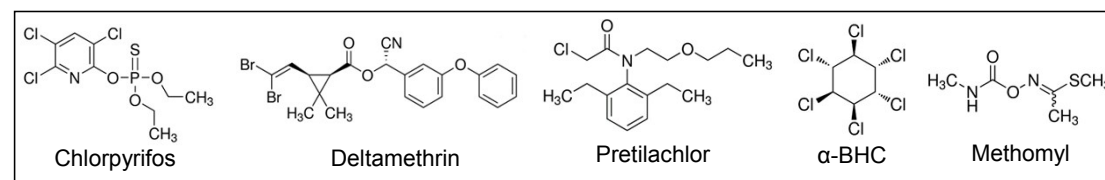

#### Other Pesticides

**Fig. S1** Molecular structures of the investigated pesticides and herbicides.

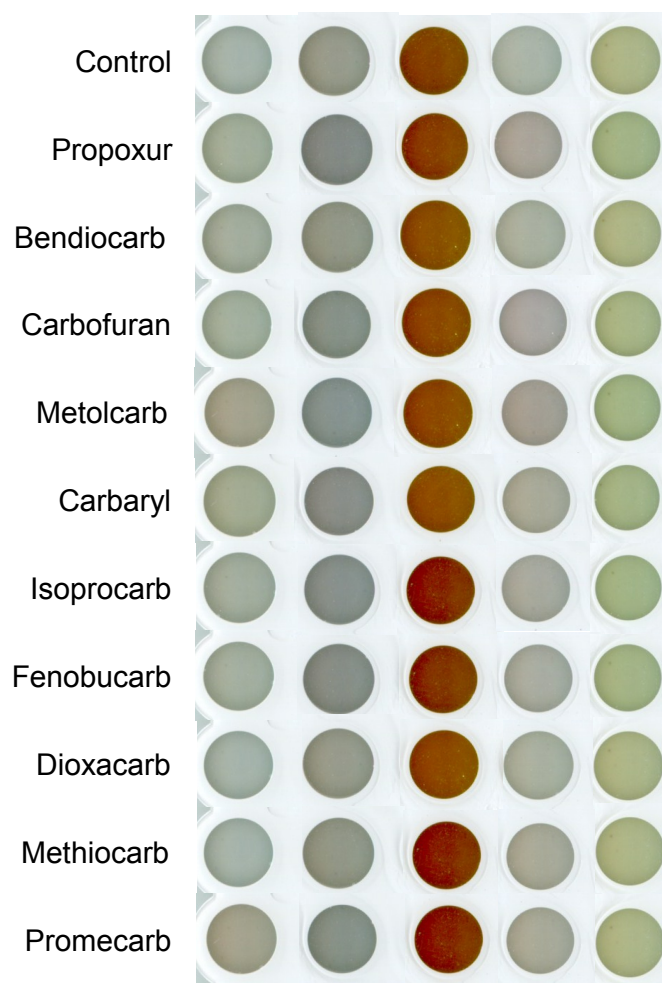

**Fig. S2** The colors of the array in the presence and absence of different N-methyl carbamates. The concentrations of N-methyl carbamates were  $10^{-4}$  g/L.

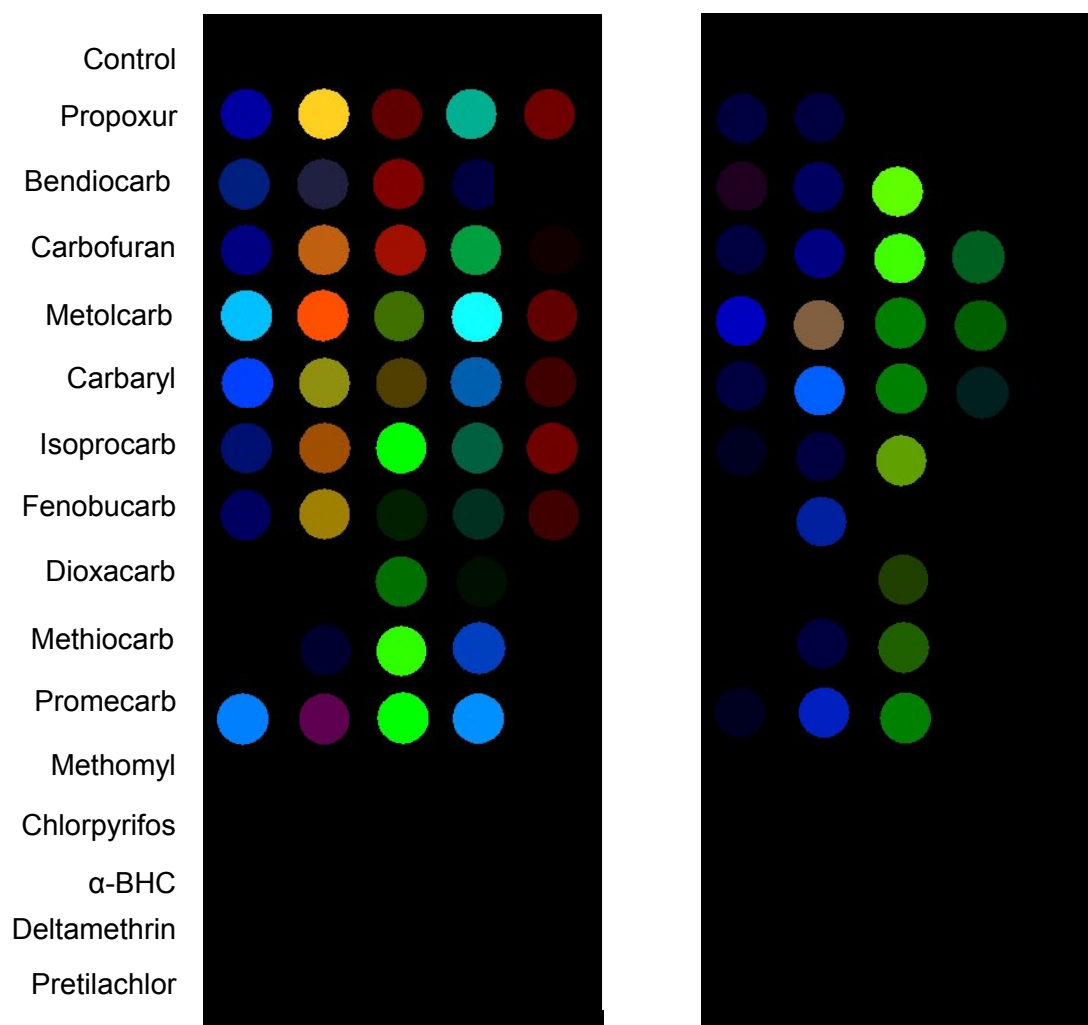

**Fig. S3** Color difference maps of the array for all of the investigated pesticides and a control. The concentrations of N-methyl carbamates were  $10^{-4}$  g/L (left) and  $10^{-5}$  g/L (right), respectively; organophosphates (i.e., chlorpyrifos), other kind of carbamates (i.e., methomyl), organochlorines (i.e.,  $\alpha$ -BHC), pyrethroids (i.e., deltamethrin) and herbicides (i.e., pretilachlor) were at  $10^{-3}$  g/L. For purposes of visualization, the color range of the difference maps for all the pesticides and a control was expanded from 4 to 8 bits per color (RGB range of 4-19 expanded to 0-255, left) and 3 to 8 bits per color (RGB range of 3-10 expanded to 0-255, right). A full database of the color differences are shown in Tables S3 (For each row, the 15 numbers represent the change in R, G, and B values of the  $1 \times 5$  array, i.e., after exposure – before exposure). All of the experiments were performed in quintuplicate.

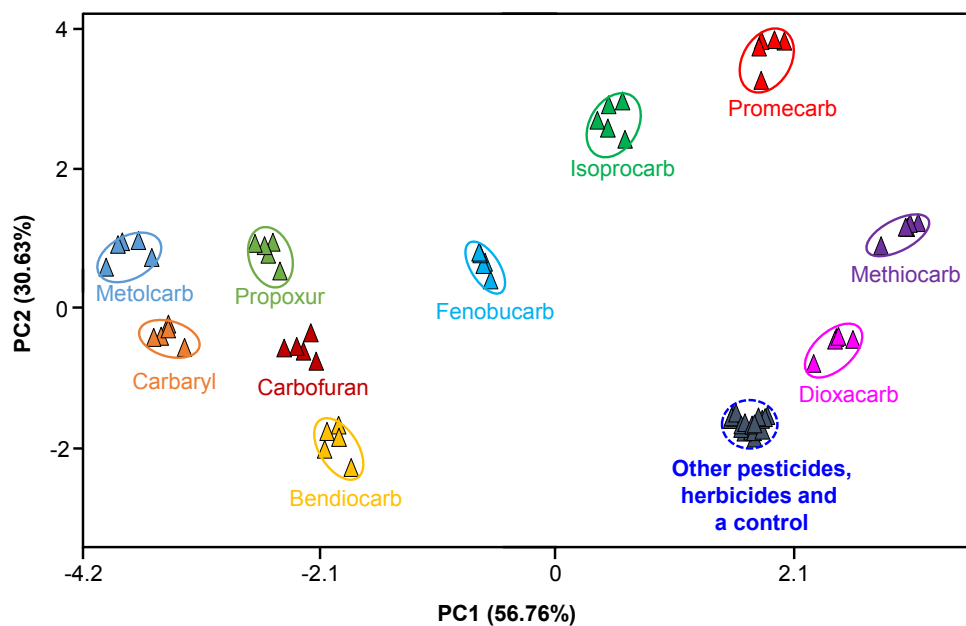

**Fig. S4** Two-dimensional principal component analysis plot of the array for N-methyl carbamates, organophosphates (chlorpyrifos), other kind of carbamates (methomyl), organochlorines ( $\alpha$ -BHC), pyrethroids (deltamethrin), herbicides (pretilachlor), and a control. All of the experiments were performed in quintuplicate. The concentrations of N-methyl carbamates were  $10^{-4}$  g/L; others were at  $10^{-3}$  g/L.

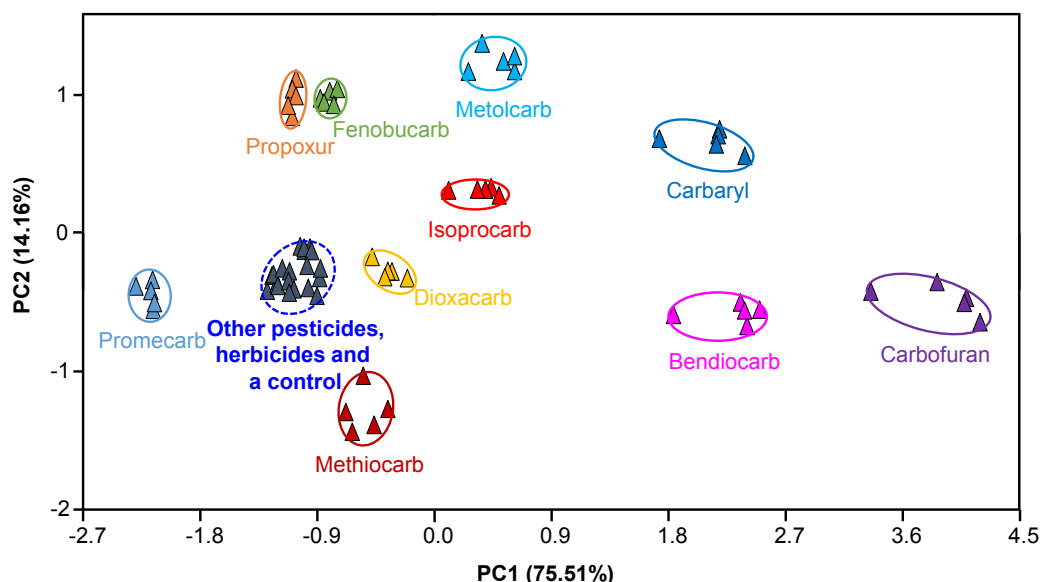

**Fig. S5** Two-dimensional principal component analysis plot of the array for N-methyl carbamates, organophosphates (chlorpyrifos), other kind of carbamates (methomyl), organochlorines ( $\alpha$ -BHC), pyrethroids (deltamethrin), herbicides (pretilachlor), and a control. All of the experiments were performed in quintuplicate. The concentrations of N-methyl carbamates were  $10^{-5}$  g/L; others were at  $10^{-3}$  g/L.

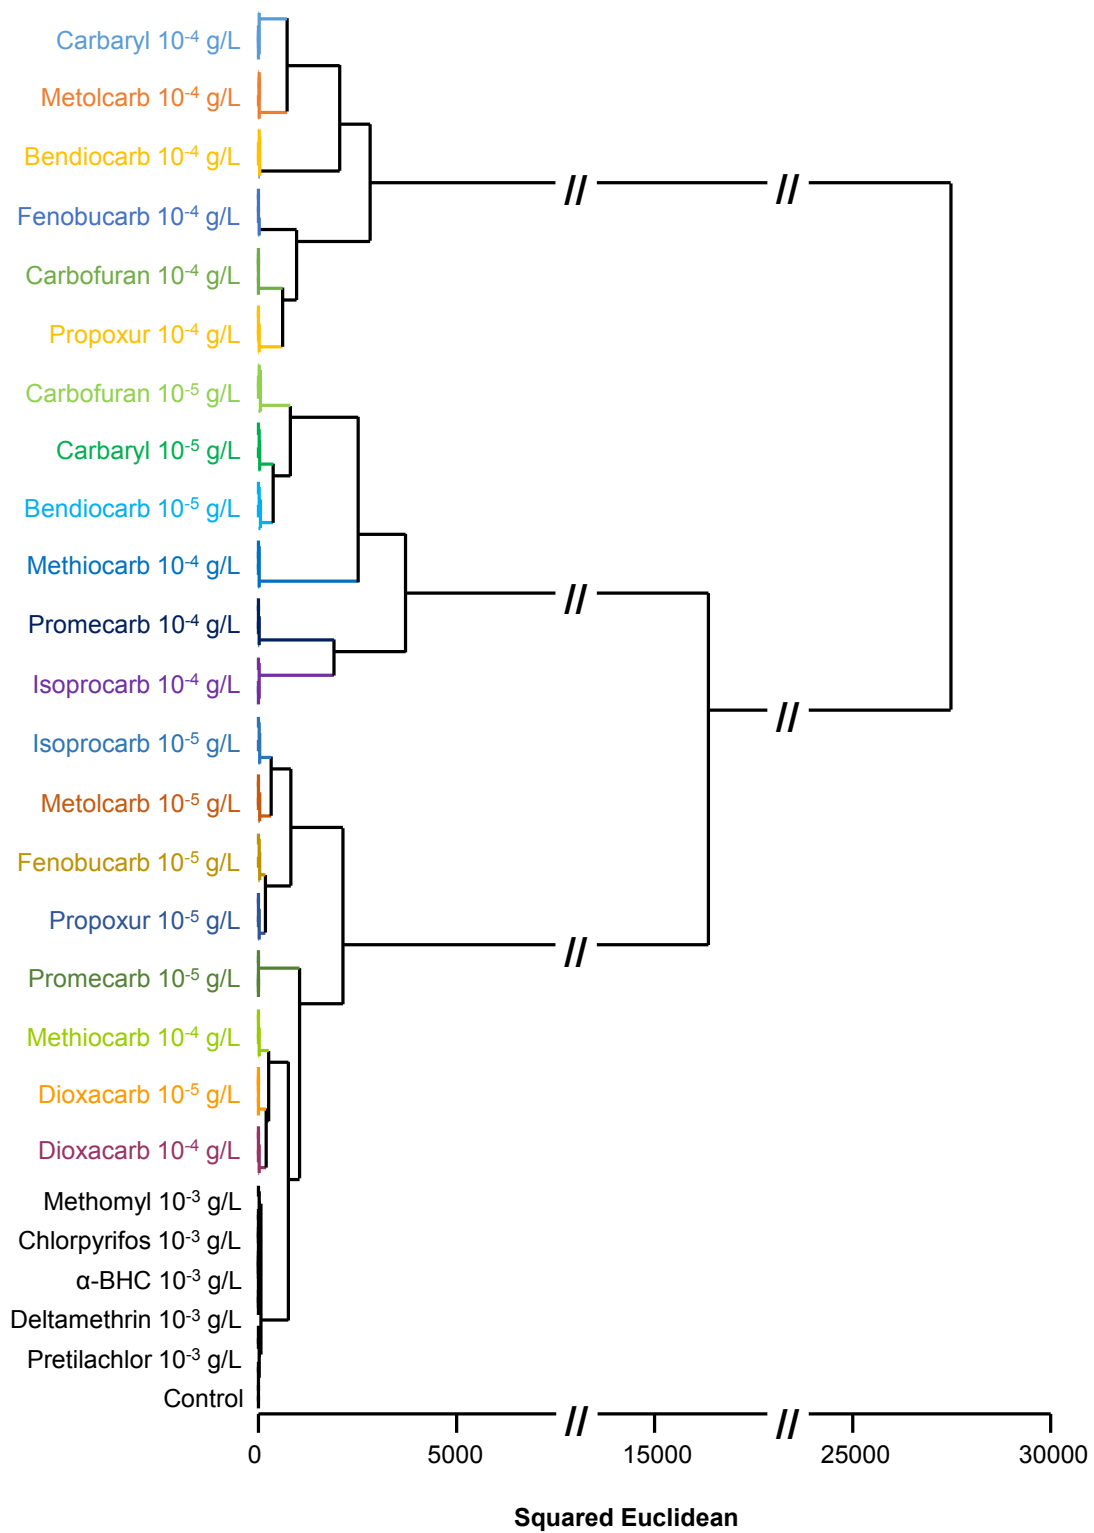

**Fig. S6** Hierarchical cluster analysis for N-methyl carbamates, organophosphates, other kinds of carbamates, organochlorines, pyrethroids, herbicides and a control. All of the experiments were performed in quintuplicate.

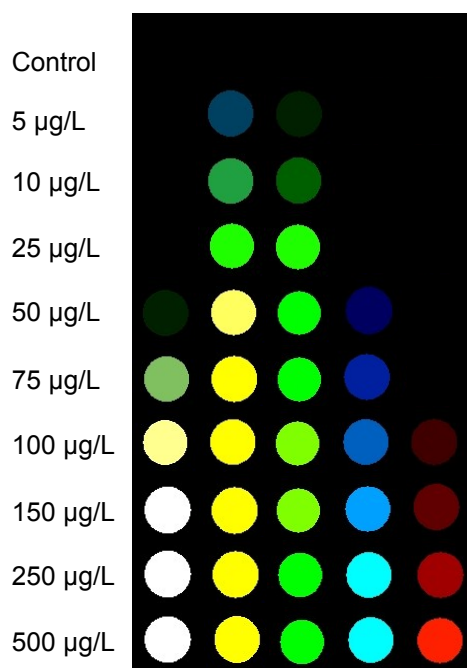

**Fig. S7** Color difference maps of the array for carbaryl at different concentrations and a control. For purposes of visualization, the color range of these difference maps of methomyl was expanded from 3 to 8 bits per color (RGB range of 3-10 expanded to 0-255). All of the experiments were performed in triplicate.

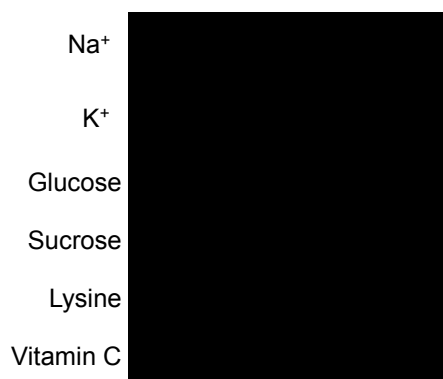

**Fig. S8** Color difference maps of the array for a variety of possible interferants in food samples; the color range of these difference maps was expanded from 3 to 8 bits per color (RGB range of 3-10 expanded to 0-255). All of the experiments were performed in triplicate. The concentrations of Na<sup>+</sup>, K<sup>+</sup>, glucose, sucrose, lysine and vitamin C were 10<sup>-3</sup> g/L.

**Table S2** The RSDs for the quintuplicate tests.

| <b>N-methyl carbamates</b> | <b>RSDs</b>   |               |
|----------------------------|---------------|---------------|
|                            | $10^{-5}$ g/L | $10^{-4}$ g/L |
| Carbaryl                   | 6.8%          | 2.0%          |
| Metolcarb                  | 4.8%          | 2.5%          |
| Isoprocarb                 | 6.9%          | 4.7%          |
| Carbofuran                 | 6.4%          | 2.7%          |
| Propoxur                   | 7.0%          | 3.3%          |
| Promecarb                  | 4.7%          | 4.6%          |
| Methiocarb                 | 1.3%          | 5.2%          |
| Bendiocarb                 | 6.6%          | 2.8%          |
| Dioxacarb                  | 1.1%          | 13.5%         |
| Fenobucarb                 | 6.0%          | 5.1%          |



**Table S3** Database for pesticides at different concentrations and a control (R1 to R5, G1 to G5, and B1 to B5 refer to the differences of the red, green, and blue (RGB) values from the center of every indicator solution (in 96-well plates) from the “before” and “after” images, respectively).

|                       | R1        | G1        | B1        | R2        | G2        | B2         | R3         | G3         | B3        | R4        | G4        | B4        | R5        | G5        | B5        |
|-----------------------|-----------|-----------|-----------|-----------|-----------|------------|------------|------------|-----------|-----------|-----------|-----------|-----------|-----------|-----------|
| Control-1             | -0.626083 | 0.350723  | 0.040573  | 0.770233  | 1.130081  | 1.21373    | -0.30011   | -0.504951  | -0.000683 | -0.012634 | -0.07341  | 0.13623   | -0.09491  | -0.448959 | -1.042343 |
| Control-2             | -0.292755 | 0.27536   | 0.142029  | 0.659271  | 1.268005  | 0.907135   | -0.189484  | -0.174126  | -0.000683 | 0.07341   | -0.116776 | 0.106522  | -0.372131 | -0.284393 | -1.091171 |
| Control-3             | -0.623184 | 0.365219  | 0.269562  | 0.905777  | 1.158752  | 1.162506   | -0.455109  | 0.1847     | 0.000683  | 0.025604  | -0.031403 | 0.184708  | -0.095596 | -0.419937 | -0.855576 |
| Control-4             | -0.573914 | 0.260864  | 0.104355  | 0.854904  | 1.162521  | 1.067261   | -0.331177  | -0.209969  | 0.002048  | 0.015717  | -0.052933 | 0.18779   | 0.05394   | -0.319901 | -1.253326 |
| Control-5             | -0.544922 | 0.281158  | 0.379715  | 0.55719   | 1.250946  | 0.956985   | -0.397736  | 0.346535   | 0.002731  | -0.011948 | -0.106522 | 0.167969  | -0.009216 | -0.445541 | -1.305908 |
| propoxar 10-4 g/L-1   | 2.7173    | 4.993515  | 14.997955 | 19.599182 | 17.662003 | 6.707397   | -6.467041  | -3.266991  | 0         | 0.456802  | 15.60704  | 13.268005 | 11.086029 | 2.238647  | 0.669271  |
| propoxar 10-4 g/L-2   | 3.444519  | 5.824509  | 16.22908  | 21.084671 | 18.690338 | 8.09935    | -5.320923  | -0.309322  | 0.002048  | 1.156021  | 16.627869 | 14.166946 | 10.711853 | 1.613174  | 0.127686  |
| propoxar 10-4 g/L-3   | 2.27211   | 4.681122  | 14.916687 | 21.581085 | 19.171738 | 8.132126   | -5.407654  | -1.513485  | -0.004438 | 1.251282  | 16.825882 | 14.34552  | 10.780136 | 1.433258  | 0.226349  |
| propoxar 10-4 g/L-4   | 2.711166  | 5.171387  | 15.325714 | 21.703659 | 19.32605  | 8.739151   | -5.381363  | -0.572552  | -0.00341  | 1.365311  | 17.32811  | 14.78627  | 10.760315 | 1.21812   | -0.047104 |
| propoxar 10-4 g/L-5   | 3.743256  | 5.942993  | 15.772263 | 21.764084 | 18.99612  | 8.673264   | -5.25708   | -0.989758  | -0.002048 | 1.554108  | 17.528503 | 14.872314 | 11.392288 | 2.110275  | 1.079208  |
| bendiocarb 10-4 g/L-1 | 1.950836  | 6.034149  | 12.585526 | 6.862411  | 6.830307  | 8.747345   | -8.81221   | -20.444519 | 0         | 1.092178  | 4.91362   | 8.059738  | 0.550354  | 0.532608  | 0.204163  |
| bendiocarb 10-4 g/L-2 | 2.540115  | 9.948105  | 16.918747 | 7.794128  | 7.130768  | 9.541824   | -6.602249  | -17.309666 | 0.004438  | 1.41925   | 5.182663  | 8.218842  | 0.252655  | -0.081589 | -0.292938 |
| bendiocarb 10-4 g/L-3 | 2.011612  | 10.379303 | 17.03653  | 7.627853  | 6.862076  | 9.486176   | -7.249237  | -18.577328 | -0.001707 | 1.55275   | 5.117447  | 8.232849  | 0.930359  | 0.569489  | 0.570847  |
| bendiocarb 10-4 g/L-4 | 1.966597  | 8.699203  | 15.87027  | 7.87265   | 6.833389  | 9.539764   | -7.45134   | -18.309662 | 0.010925  | 1.437012  | 5.036545  | 8.361206  | 0.240356  | -0.034836 | -0.358139 |
| bendiocarb 10-4 g/L-5 | 2.817688  | 8.874023  | 15.827576 | 7.606689  | 5.929321  | 8.427444   | -8.430176  | -20.552067 | 0.004097  | 1.495728  | 5.053604  | 8.400818  | 0.952194  | 0.694778  | 0.91806   |
| Carbofuran 10-4 g/L-1 | 2.336288  | 3.690338  | 12.251282 | 16.961075 | 10.206894 | 5.596786   | -8.994537  | -11.314445 | 0         | 1.035507  | 14.836472 | 8.385452  | 4.876404  | -0.546408 | -0.664734 |
| Carbofuran 10-4 g/L-2 | 3.048141  | 4.624451  | 13.631271 | 18.122233 | 10.643234 | 6.489578   | -7.436325  | -8.621029  | 0.004438  | 1.748383  | 15.857791 | 9.159088  | 5.200409  | -0.318192 | -0.287125 |
| Carbofuran 10-4 g/L-3 | 1.914642  | 3.527481  | 12.368713 | 18.124619 | 10.862762 | 6.48378    | -8.072723  | -10.546604 | -0.004097 | 1.898254  | 16.127686 | 9.127014  | 5.091507  | -0.445877 | -0.3479   |
| Carbofuran 10-4 g/L-4 | 2.506317  | 3.89621   | 12.452402 | 18.28064  | 11.019791 | 6.561966   | -8.502213  | -10.329803 | 0.001707  | 1.949463  | 16.377009 | 9.472885  | 5.556152  | 0.14476   | 0.167984  |
| Carbofuran 10-4 g/L-5 | 2.988836  | 4.472183  | 13.44075  | 18.024582 | 10.959665 | 6.312729   | -8.88593   | -11.238651 | 0.001707  | 2.219528  | 16.680435 | 9.690855  | 5.115738  | 0.104813  | 0.317856  |
| Metolcarb 10-4 g/L-1  | 1.688965  | 16.077499 | 27.658585 | 19.545242 | 9.938202  | -0.563339  | -8.958679  | -11.229774 | 0         | 5.311707  | 20.576309 | 19.130081 | 10.891083 | 1.68045   | 0.272095  |
| Metolcarb 10-4 g/L-2  | 2.946111  | 14.41243  | 25.452713 | 19.806427 | 9.681808  | -1.061798  | -8.517242  | -10.035847 | 0.003756  | 5.99147   | 21.683517 | 19.79924  | 11.005127 | 1.309662  | 0.172073  |
| Metolcarb 10-4 g/L-3  | 1.210514  | 11.538406 | 22.761353 | 20.188797 | 9.987717  | -1.441101  | -8.893143  | -10.835438 | -0.005804 | 5.609085  | 21.545227 | 19.509735 | 11.565384 | 1.72551   | 0.683167  |
| Metolcarb 10-4 g/L-4  | 2.472519  | 13.836792 | 24.938202 | 20.511444 | 10.26561  | -1.089462  | -9.634689  | -11.019798 | 0.009901  | 6.011597  | 22.564697 | 21.019119 | 11.056335 | 1.157043  | 0.176178  |
| Metolcarb 10-4 g/L-5  | 3.595764  | 12.897919 | 23.697845 | 20.181625 | 9.832703  | -1.43428   | -10.634689 | -13.70229  | 0.004097  | 6.336624  | 22.739502 | 21.055313 | 11.050222 | 1.206894  | 0.560593  |
| Carbaryl 10-4 g/L-1   | 2.756561  | 8.132477  | 23.359512 | 13.855591 | 13.789337 | 5.051544   | -11.095956 | -16.735748 | 0         | 1.554108  | 10.915329 | 15.308975 | 7.906448  | 0.603622  | -0.560257 |
| Carbaryl 10-4 g/L-2   | 4.349274  | 11.058044 | 24.221237 | 15.106522 | 14.32811  | 5.893478   | -10.513824 | -15.120174 | 0.004438  | 1.855927  | 11.573242 | 15.736084 | 8.471161  | 0.827927  | -0.649033 |
| Carbaryl 10-4 g/L-3   | 2.870605  | 9.565369  | 23.770218 | 15.182999 | 14.456131 | 6.069641   | -10.794815 | -16.475246 | -0.001024 | 2.193924  | 11.826904 | 15.812912 | 8.750427  | 1.117447  | -0.115402 |
| Carbaryl 10-4 g/L-4   | 2.359177  | 7.971469  | 24.927277 | 15.359512 | 14.534653 | 6.232162   | -11.274155 | -16.86412  | 0.011949  | 1.759644  | 11.838516 | 15.819046 | 8.89006   | 1.184357  | 0.021515  |
| Carbaryl 10-4 g/L-5   | 2.579376  | 7.476959  | 24.57254  | 15.281326 | 14.30249  | 5.76886    | -9.917374  | -15.491978 | 0.004438  | 2.25708   | 12.231812 | 16.063843 | 9.108566  | 1.61796   | 0.976089  |
| Isoprocarb 10-4 g/L-1 | 2.067596  | 5.334595  | 11.225342 | 14.182663 | 9.048477  | -0.884613  | -1.96312   | -22.680055 | -0.003703 | 2.262878  | 10.185394 | 8.441101  | 11.378281 | 1.401169  | -0.10159  |
| Isoprocarb 10-4 g/L-2 | 3.641861  | 7.105148  | 13.18573  | 15.318542 | 9.833054  | -0.696823  | -0.517242  | 26.246159  | -0.00478  | 2.753159  | 11.245148 | 9.228058  | 11.097305 | 1.901027  | -0.616943 |
| Isoprocarb 10-4 g/L-3 | 2.730286  | 6.212692  | 12.254684 | 14.328781 | 9.650742  | -1.014343  | -1.296692  | 22.941959  | -0.015364 | 3.050522  | 11.497101 | 9.260162  | 11.447601 | 1.249573  | -0.057022 |
| Isoprocarb 10-4 g/L-4 | 3.214752  | 6.788666  | 12.732681 | 15.06282  | 9.969269  | -1.428818  | -1.500854  | 23.2119495 | -0.003414 | 3.139633  | 11.912949 | 9.625243  | 11.417542 | 1.131104  | -0.036865 |
| Isoprocarb 10-4 g/L-5 | 3.627182  | 7.365997  | 13.20058  | 14.842941 | 9.262543  | -1.921478  | -2.066574  | 24.972343  | -0.003756 | 3.403214  | 12.072372 | 9.680786  | 11.76442  | 1.578018  | 0.944687  |
| Fenobucarb 10-4 g/L-1 | 2.04541   | 4.125305  | 10.493347 | 14.615906 | 12.229767 | 4.541138   | -0.69101   | 3.574257   | -0.000683 | 1.060425  | 7.980194  | 6.541824  | 8.693405  | 1.644592  | 0.657211  |
| Fenobucarb 10-4 g/L-2 | 2.037216  | 4.380676  | 10.86377  | 16.409363 | 13.307617 | 6.067187   | 0.165588   | 5.593037   | 0.00239   | 1.594055  | 8.663712  | 6.89621   | 7.992493  | 0.867555  | -0.091156 |
| Fenobucarb 10-4 g/L-3 | 1.571518  | 3.90065   | 10.348923 | 16.520309 | 13.51921  | 6.306931   | 0.527145   | 5.346878   | 0.001366  | 1.717651  | 8.753494  | 6.750427  | 9.244661  | 1.777405  | 0.968582  |
| Fenobucarb 10-4 g/L-4 | 1.92012   | 4.353699  | 10.910217 | 16.727554 | 13.892792 | 6.94019    | 0.49536    | 6.379993   | 0.000341  | 1.728912  | 9.100723  | 7.227371  | 8.834747  | 1.300781  | 0.746002  |
| Fenobucarb 10-4 g/L-5 | 2.553085  | 4.791748  | 10.955948 | 16.640152 | 13.693405 | 6.489929   | 0.053955   | 6.455788   | 0.001707  | 1.800278  | 9.174118  | 7.181976  | 9.095932  | 1.68692   | 1.286438  |
| Dioxaecarb 10-4 g/L-1 | -0.221237 | 0.057358  | 0.283707  | 0.427094  | 0.508369  | 3.124666   | 8.43005    | 0.023216   | 1.279266  | -0.815292 | -0.174454 | 1.279266  | -0.815292 | -0.174454 | -0.174454 |
| Dioxaecarb 10-4 g/L-2 | -0.016037 | 0.556033  | 1.210312  | -0.112671 | -1.198021 | -0.860016  | 4.229095   | 11.405251  | -0.00239  | 1.9935    | -0.273132 | -0.16217  | 1.9935    | -0.273132 | -0.16217  |
| Dioxaecarb 10-4 g/L-3 | -0.147842 | 0.190842  | 0.39502   | -0.69136  | -1.789001 | -0.504265  | 4.404572   | 12.156029  | -0.005463 | 1.857635  | -0.312042 | -0.340057 | 1.857635  | -0.312042 | -0.340057 |
| Dioxaecarb 10-4 g/L-4 | -0.182312 | 0.282349  | 0.772614  | -0.365646 | -1.723457 | -0.997269  | 3.575958   | 11.174491  | 0         | 2.376236  | 0.260834  | -0.006149 | 2.376236  | 0.260834  | -0.006149 |
| Dioxaecarb 10-4 g/L-5 | 0.027664  | 0.27449   | 0.599869  | -0.800231 | -1.44384  | -0.022873  | 4.164215   | 11.994194  | 0         | 2.355408  | 0.191193  | 0.099014  | 2.355408  | 0.191193  | 0.099014  |
| Methiocarb 10-4 g/L-1 | -1.326721 | -0.590988 | -0.617279 | 3.272446  | 0.08091   | -7.807098  | -7.202454  | 22.267207  | 0.021168  | 1.148849  | 2.186401  | 2.691017  | 1.148849  | 2.186401  | 2.691017  |
| Methiocarb 10-4 g/L-2 | -1.393982 | -0.613861 | -0.237976 | 3.398773  | -0.593719 | -9.897232  | -8.027649  | 24.664391  | 0         | 0.832352  | 1.771591  | 2.73132   | 0.832352  | 1.771591  | 2.73132   |
| Methiocarb 10-4 g/L-3 | -0.988052 | -0.423355 | -0.159439 | 2.810516  | -0.774323 | -9.85994   | -7.83374   | 25.666779  | -0.005463 | 0.752823  | 1.773651  | 2.06282   | 0.752823  | 1.773651  | 2.06282   |
| Methiocarb 10-4 g/L-4 | -0.199686 | -0.39093  | -0.20076  | 2.703659  | -1.238647 | -10.250938 | -8.056034  | 25.141685  | 0         | 1.242065  | 2.362579  | 2.811195  | 1.242065  | 2.362579  | 2.811195  |
| Methiocarb 10-4 g/L-5 | -0.601227 | 0.000687  | 0.206223  | 2.68692   | -1.075798 | -9.230453  | -8.191544  | 24.776375  | 0         | 0.677704  | 1.83076   | 2.543353  | 0.677704  | 1.83076   | 2.543353  |
| Promecarb 10-4 g/L-1  | 0.051895  | 12.922501 | 24.152954 | 10.539764 | 2.243088  | -9.854553  | -1.423355  | 27.74666   | 0.003414  | 0.306244  | 7.079793  | 1.091833  | 0.306244  | 7.079793  | 1.091833  |
| Promecarb 10-4 g/L-2  | -0.061447 | 13.921463 | 25.500854 | 12.015701 | 2.76545   | -10.076469 | -1.36087   | 33.503922  | -0.00478  | -0.239685 | 0.202454  | 0.846024  | -0.239685 | 0.202454  | 0.846024  |
| Promecarb 10-4 g/L-3  | 0.035507  | 14.372482 | 25.925919 | 12.058723 | 3.039497  | -9.067261  | -1.681473  | 33.467052  | -0.002731 | -0.154999 | 0.370102  | 0.96962   | -0.154999 | 0.370102  | 0.96962   |
| Promecarb 10-4 g/L-4  | 0.102097  | 14.597473 | 26.502899 | 11.95153  | 2.790718  | -9.901329  | -2.520996  | 32.548306  | 0         | 0.290894  | 0.667114  | 1.332535  | 0.290894  | 0.667114  | 1.332535  |
| Promecarb 10-4 g/L-5  | 0.217484  | 14.525772 | 27        | 11.755203 | 2.597473  | -9.196312  | -2.623428  | 31.908157  | 0         | -0.276886 | 0.314102  | 0.898262  | -0.276886 | 0.314102  | 0.898262  |
| propoxar 10-5 g/L-1   | -2.91568  | 1.039948  | 5.260162  | 1.740524  | 2.549332  | 5.983269   | -2.75589   | -3.367699  | 0.013657  | 2.098074  | 2.619324  | 2.799204  | 0.841583  | -0.4      |           |

|                         | R1        | G1        | B1        | R2        | G2        | B2        | R3        | G3        | B3        | R4        | G4        | B4        | R5        | G5        | B5        |
|-------------------------|-----------|-----------|-----------|-----------|-----------|-----------|-----------|-----------|-----------|-----------|-----------|-----------|-----------|-----------|-----------|
| Dioxcarb 10-5 g/L-1     | -0.208252 | 0.139969  | 0.534302  | 2.349258  | 1.822815  | 0.814613  | 3.767838  | 3.04541   | 0.023216  | -0.061111 | 0.988388  | 2.089447  | -0.60498  | -0.398422 | -0.847382 |
| Dioxcarb 10-5 g/L-2     | -0.170364 | 0.095245  | 0.322296  | 2.238647  | 1.688293  | 0.232849  | 4.936508  | 5.340042  | 0         | 0.092514  | 1.453384  | 2.742584  | -0.67157  | -0.420624 | -0.906792 |
| Dioxcarb 10-5 g/L-3     | -0.027664 | 0.265961  | 0.400131  | 2.25708   | 1.519974  | 0.321953  | 4.528503  | 4.363266  | -0.001366 | -0.115402 | 1.343796  | 2.477982  | -0.590988 | -0.493347 | -0.875725 |
| Dioxcarb 10-5 g/L-4     | -0.027649 | 0.293945  | 0.447922  | 2.223282  | 1.496414  | 0.173439  | 4.088425  | 4.213722  | 0         | 0.095245  | 1.297028  | 2.659958  | -0.694427 | -0.39946  | -0.911575 |
| Dioxcarb 10-5 g/L-5     | -0.044373 | 0.317505  | 0.621719  | 2.097641  | 1.456467  | -0.302155 | 3.829971  | 4.273125  | 0         | -0.049164 | 1.004776  | 1.934448  | -0.632629 | -0.337311 | -0.672585 |
| Methiocarb 10-5 g/L-1   | -0.513824 | -0.288162 | -0.621719 | -1.228409 | -2.911232 | -3.653122 | 3.623764  | 4.978149  | 0.021168  | -0.890411 | -0.007858 | 1.158417  | 0.655853  | 1.023209  | 1.26664   |
| Methiocarb 10-5 g/L-2   | -0.005112 | 0.290878  | 0.199722  | -2.018433 | -3.946396 | -5.52475  | 4.128036  | 7.094566  | 0         | -0.931717 | 0.055298  | 1.160126  | 0.426758  | 0.623077  | 0.595428  |
| Methiocarb 10-5 g/L-3   | -0.054977 | 0.005127  | -0.464661 | -2.664047 | -4.727898 | -6.041649 | 4.231476  | 6.488564  | -0.003414 | -0.656891 | 0.220551  | 1.191193  | 0.320938  | 0.615921  | 0.694435  |
| Methiocarb 10-5 g/L-4   | 0.171738  | 0.378616  | 0.015015  | -3.089447 | -5.53772  | -7.172073 | 3.538742  | 5.441444  | 0         | -0.637421 | 0.187439  | 1.225677  | 0.502563  | 0.799927  | 1.037552  |
| Methiocarb 10-5 g/L-5   | 0.283371  | 0.41243   | 0.049515  | -3.006836 | -5.255043 | -6.110275 | 2.801636  | 4.77774   | 0         | -0.589615 | 0.506317  | 1.639465  | 0.545578  | 0.784576  | 1.03653   |
| Promecarb 10-5 g/L-1    | -0.506653 | 1.192551  | 4.290192  | -1.223969 | -3.153633 | -6.850113 | -1.28952  | -8.289856 | 0.018778  | 0.207916  | 1.695114  | 2.507339  | 0.674973  | 0.742905  | 0.753159  |
| Promecarb 10-5 g/L-2    | -0.492645 | 1.613861  | 5.285508  | -1.936493 | -4.510071 | -9.072716 | -1.329453 | -7.589287 | 0         | 0.314102  | 1.794464  | 2.530212  | 0.213379  | 0.25264   | 0.335953  |
| Promecarb 10-5 g/L-3    | -0.404587 | 1.244446  | 4.635376  | -1.56163  | -4.001709 | -7.422325 | -1.75351  | -9.068962 | 0.001024  | 0.264923  | 1.586884  | 2.272797  | 0.193924  | 0.320938  | 0.470467  |
| Promecarb 10-5 g/L-4    | -0.607361 | 1.317856  | 4.900986  | -1.446564 | -3.927277 | -7.665413 | -1.38443  | -8.117111 | 0         | 0.428131  | 1.644592  | 2.216461  | 0.375565  | 0.352341  | 0.354042  |
| Promecarb 10-5 g/L-5    | -0.312393 | 1.520645  | 5.138275  | -1.991119 | -4.538063 | -8.094574 | -1.537735 | -7.621033 | 0         | 0.194611  | 1.509735  | 2.09082   | 0.403549  | 0.419266  | 0.770569  |
| Pretilachlor 10-3 g/L-1 | -1.337997 | -1.570831 | -2.833725 | 0.538071  | 0.751114  | -0.197327 | -1.184708 | -1.288147 | -3.016037 | -0.669861 | -0.698196 | -0.088074 | -0.25264  | 0.059052  | -0.245132 |
| Pretilachlor 10-3 g/L-2 | -0.223969 | -0.44281  | -1.479691 | 0.377945  | 0.908173  | -0.19426  | -1.073395 | -1.346527 | -2.684189 | -0.772629 | -0.566406 | -0.386826 | -0.199722 | -0.076813 | -0.118469 |
| Pretilachlor 10-3 g/L-3 | -0.361893 | -0.657898 | -1.813934 | 0.484467  | 0.649017  | -0.246506 | -0.744293 | -0.955276 | -3.456474 | -0.736084 | -0.568787 | -0.426773 | -0.097305 | -0.074417 | -0.338684 |
| α-BHC 10-3 g/L-1        | -0.86377  | -0.725845 | -0.449631 | 0.519974  | 0.779785  | -0.48822  | -0.697159 | -1.356094 | -3.387497 | -0.875046 | -0.564362 | -0.338013 | 0.023895  | -0.238312 | -0.088089 |
| α-BHC 10-3 g/L-2        | -0.49881  | -0.246841 | 0.078186  | 0.411407  | 0.746338  | -0.131775 | -0.488907 | -1.006836 | -2.792755 | -0.654144 | -0.771255 | -0.556503 | -0.048477 | -0.110626 | -0.296356 |
| α-BHC 10-3 g/L-3        | -0.476273 | -0.320236 | -0.136566 | 0.352005  | 0.863083  | -0.106186 | -0.24855  | -0.557175 | -2.52681  | -0.680435 | -0.559921 | -0.446915 | -0.122574 | -0.109589 | -0.336975 |
| Methomy1 10-3 g/L-1     | -1.544205 | -1.414474 | -1.173096 | 0.486511  | 0.629562  | -0.281998 | -0.374878 | -0.921478 | -2.761688 | -0.808807 | -0.641525 | -0.460907 | -0.778427 | -0.753494 | -0.079895 |
| Methomy1 10-3 g/L-2     | -1.007858 | -0.898254 | -0.505981 | 0.589951  | 0.588943  | -0.222595 | 0.001709  | -0.474213 | -2.70195  | -0.779785 | -0.441788 | -0.536026 | -0.803345 | -0.874023 | 0.321609  |
| Methomy1 10-3 g/L-3     | -1.019455 | -0.759308 | -0.643219 | -0.161819 | 0.42746   | -0.515884 | 0.394333  | -0.132462 | -2.3974   | -0.314102 | -0.16217  | -0.059402 | -0.735062 | -0.688965 | -0.121872 |
| Deltamethrin 10-3 g/L-1 | -1.625473 | -1.503586 | -1.832016 | 0.349945  | 0.630249  | -0.024918 | 0.234879  | -0.275528 | -2.52919  | -0.541809 | -0.404922 | -0.315125 | -0.859009 | -0.923172 | -0.077148 |
| Deltamethrin 10-3 g/L-2 | -0.582108 | -0.374191 | -0.746338 | 0.181641  | 0.495392  | -0.097977 | 1.037552  | 0.569473  | -2.145096 | -0.612503 | -0.320587 | -0.381012 | -0.78833  | -0.925232 | -0.318207 |
| Deltamethrin 10-3 g/L-3 | -0.705017 | -0.562988 | -1.040283 | 0.222946  | 0.517242  | -0.403214 | 1.593384  | 1.109589  | -1.068283 | -0.44725  | -0.133499 | -0.117096 | -0.675323 | -0.943665 | -0.136566 |
| Chlorpyrifos 10-3 g/L-1 | -0.254364 | -0.313065 | -1.33049  | 0.259811  | 0.909531  | 1.089096  | 0.261871  | 1.240021  | 1.523041  | -0.471832 | -0.426758 | -0.951859 | -0.886658 | -0.651077 | -0.207932 |
| Chlorpyrifos 10-3 g/L-2 | -0.86377  | -0.725845 | -0.449631 | 0.368042  | 1.092178  | 1.36293   | 0.435638  | 1.042343  | 1.569122  | -0.575958 | -0.339706 | -0.845337 | -0.915329 | -0.683853 | -0.232849 |
| Chlorpyrifos 10-3 g/L-3 | -0.934799 | -0.694443 | -1.111984 | 0.533966  | 1.135193  | 1.580734  | 0.274155  | 0.225677  | 0.008881  | -0.553085 | -0.359177 | -1.257431 | -0.278946 | -0.355408 | 0.15535   |
